# Supplementary material for: Women with polycystic ovary syndrome have poorer work ability and higher disability retirement rate at midlife: a Northern Finland Birth Cohort 1966 study
Source: PubMed Central journal article supplement (PMC9422246; doi:10.1530/eje-22-0027), 2022-07-13
Supplement: supplementary_table_1.pdf [file supplementary_table_1.pdf]

1 **Supplementary data**

2

3

4

5

6

**Supplementary Table 1.** Registered two-year follow-up of participation in working life starting from the 46-year study. Mean and median counts of registered disability and unemployment days during the individually determined two-year follow-up periods (730 days) in women with and without PCOS, and in relation to all covariates at age 46. With highly skewed distributions of the days, the medians are only marked if not zero.

|                                               | N        |      | Disability days<br>(range 0–730)<br>Mean (Median if not=0) |                  | <i>p</i>     | Unemployment days<br>(range 0–730)<br>Mean (Median if not=0) |                  | <i>p</i>     |
|-----------------------------------------------|----------|------|------------------------------------------------------------|------------------|--------------|--------------------------------------------------------------|------------------|--------------|
|                                               | Non-PCOS | PCOS | Non-PCOS                                                   | PCOS             |              | Non-PCOS                                                     | PCOS             |              |
| <b>All participants</b>                       | 1531     | 242  | 40                                                         | 72               | <b>0.008</b> | 59                                                           | 90               | <b>0.003</b> |
| <b>In relation to covariates at age 46:</b>   |          |      |                                                            |                  |              |                                                              |                  |              |
| <b>Self-rated health (<i>p</i>)</b>           |          |      | <b>&lt;0.001</b>                                           | <b>0.005</b>     |              | <b>&lt;0.001</b>                                             | <b>0.132</b>     |              |
| Good                                          | 1043     | 132  | 15                                                         | 32               |              | 44                                                           | 67               |              |
| Poor                                          | 478      | 105  | 96                                                         | 117              |              | 90                                                           | 119              |              |
| <b>BMI</b>                                    |          |      | <b>&lt;0.001</b>                                           | <b>0.254</b>     |              | <b>0.431</b>                                                 | <b>0.361</b>     |              |
| <25                                           | 755      | 91   | 37                                                         | 65               |              | 49                                                           | 72               |              |
| 25–30                                         | 460      | 74   | 30                                                         | 58               |              | 62                                                           | 86               |              |
| >30                                           | 288      | 70   | 64                                                         | 80               |              | 78                                                           | 110              |              |
| <b>Alcohol consumption</b>                    |          |      | <b>0.041</b>                                               | <b>0.647</b>     |              | <b>0.028</b>                                                 | <b>0.685</b>     |              |
| Abstinence                                    | 181      | 37   | 86                                                         | 81               |              | 68                                                           | 119              |              |
| Low-risk drinking                             | 1223     | 182  | 32                                                         | 70               |              | 52                                                           | 85               |              |
| High-risk drinking                            | 119      | 19   | 51                                                         | 45               |              | 107                                                          | 80               |              |
| <b>Smoking</b>                                |          |      | <b>&lt;0.001</b>                                           | <b>0.135</b>     |              | <b>0.001</b>                                                 | <b>0.742</b>     |              |
| No smoking                                    | 857      | 128  | 28                                                         | 40               |              | 46                                                           | 103              |              |
| Previous/occasional                           | 343      | 49   | 47                                                         | 113              |              | 56                                                           | 65               |              |
| Regular smoking                               | 315      | 56   | 70                                                         | 104              |              | 97                                                           | 67               |              |
| <b>Physical activity</b>                      |          |      | <b>0.001</b>                                               | <b>0.496</b>     |              | <b>&lt;0.001</b>                                             | <b>0.014</b>     |              |
| Low                                           | 325      | 53   | 64                                                         | 103              |              | 83                                                           | 104              |              |
| Moderate                                      | 627      | 107  | 39                                                         | 74               |              | 65                                                           | 119              |              |
| High                                          | 571      | 78   | 25                                                         | 41               |              | 39                                                           | 40               |              |
| <b>Parity</b>                                 |          |      | <b>0.027</b>                                               | <b>0.034</b>     |              | <b>0.813</b>                                                 | <b>0.341</b>     |              |
| 0                                             | 142      | 22   | 53                                                         | 39               |              | 62                                                           | 183              |              |
| 1–2                                           | 759      | 119  | 32                                                         | 42               |              | 58                                                           | 83               |              |
| >3                                            | 515      | 82   | 49                                                         | 109              |              | 57                                                           | 67               |              |
| <b>Residential area</b>                       |          |      | <b>0.633</b>                                               | <b>0.308</b>     |              | <b>0.029</b>                                                 | <b>0.531</b>     |              |
| Urban                                         | 1013     | 141  | 41                                                         | 59               |              | 55                                                           | 86               |              |
| Rural                                         | 516      | 101  | 39                                                         | 80               |              | 68                                                           | 94               |              |
| <b>Marital status</b>                         |          |      | <b>0.734</b>                                               | <b>0.397</b>     |              | <b>&lt;0.001</b>                                             | <b>0.601</b>     |              |
| Single                                        | 334      | 44   | 51                                                         | 110              |              | 88                                                           | 94               |              |
| In a relationship                             | 1197     | 198  | 37                                                         | 63               |              | 51                                                           | 86               |              |
| <b>Education</b>                              |          |      | <b>&lt;0.001</b>                                           | <b>0.266</b>     |              | <b>&lt;0.001</b>                                             | <b>0.267</b>     |              |
| Basic                                         | 81       | 18   | 103                                                        | 171              |              | 122                                                          | 130              |              |
| Secondary                                     | 970      | 155  | 42                                                         | 78               |              | 65                                                           | 98               |              |
| Tertiary                                      | 478      | 65   | 28                                                         | 21               |              | 36                                                           | 58               |              |
| <b>Employment history</b>                     |          |      | <b>0.006</b>                                               | <b>0.669</b>     |              | <b>&lt;0.001</b>                                             | <b>&lt;0.001</b> |              |
| Continuous                                    | 1029     | 156  | 27                                                         | 46               |              | 22                                                           | 55               |              |
| Discontinuous                                 | 440      | 76   | 63                                                         | 101              |              | 144                                                          | 158              |              |
| <b>Self-rated work ability</b>                |          |      | <b>&lt;0.001</b>                                           | <b>&lt;0.001</b> |              | <b>&lt;0.001</b>                                             | <b>0.145</b>     |              |
| Good                                          | 1209     | 179  | 12                                                         | 20               |              | 48                                                           | 68               |              |
| Poor                                          | 262      | 54   | 166                                                        | 223 (20)         |              | 103                                                          | 156              |              |
| <b>Registered employment status at age 46</b> |          |      | <b>&lt;0.001</b>                                           | <b>&lt;0.001</b> |              | <b>&lt;0.001</b>                                             | <b>&lt;0.001</b> |              |
| Employment day                                | 1308     | 187  | 20                                                         | 13               |              | 24                                                           | 33               |              |
| Unemployment day                              | 102      | 28   | 32                                                         | 22               |              | 482 (545)                                                    | 477 (498)        |              |
| Disability day                                | 83       | 23   | 494 (730)                                                  | 561 (730)        |              | 31                                                           | 29               |              |
